# Supplementary material for: Highly active and selective Ti-incorporated porous silica catalysts derived from grafting of titanium(iv)acetylacetonate
Source: Royal Society of Chemistry journal article supplement (doi:10.1039/c5ta02975a), 2015-01-01
Supplement: c5ta02975a1.pdf [file c5ta02975a1.pdf]

### Supplementary information

#### **Highly active and selective Ti-incorporated porous silica catalysts derived from grafting of titanium(IV) acetylacetonate**

Miki Fukuda,<sup>a</sup> Nao Tsunoji,<sup>a\*</sup> Yuya Yagenji,<sup>a</sup> Yusuke Ide,<sup>b</sup> Shinjiro Hayakawa,<sup>a</sup> Masahiro Sadakane<sup>a</sup> and Tsuneji Sano<sup>a\*</sup>

<sup>†</sup>Department of Applied Chemistry, Graduate School of Engineering, Hiroshima University, Higashi-Hiroshima 739-8527, Japan

<sup>‡</sup>World Premier International (WPI) Research Center, International Center for Materials Nanoarchitectonics (MANA), National Institute for Materials Science (NIMS), 1-1 Namiki, Tsukuba 305-0044, Japan

\*Corresponding authors: e-mail: [tnao7373@hiroshima-u.ac.jp](mailto:tnao7373@hiroshima-u.ac.jp)

**Table S1.** Characteristics of Ti-MCM-41 catalysts synthesized using titanium isopropoxide and titanium butoxide as Ti source

|                   | Si/Ti <sup>a</sup> | BET surface area <sup>b</sup> (m <sup>2</sup> ·g <sup>-1</sup> ) | Mesopore volume <sup>c</sup> (cm <sup>3</sup> ·g <sup>-1</sup> ) | Pore diameter <sup>c</sup> (nm) |
|-------------------|--------------------|------------------------------------------------------------------|------------------------------------------------------------------|---------------------------------|
| Ti(isoPrO)-MCM-41 | 27                 | 936                                                              | 0.82                                                             | 2.7                             |
| Ti(BuO)-MCM-41    | 38                 | 925                                                              | 0.83                                                             | 2.8                             |

<sup>a</sup> Calculated by energy dispersive X-ray spectrometry.

<sup>b</sup> Determined using the BET method.

<sup>c</sup> Determined using the BJH plot.

**Table S2.** Catalytic performances of Ti(isoPrO)-MCM-41 and Ti(BuO)-MCM-41 in the epoxidation of cyclohexene with *tert*-butyl hydroperoxide as an oxidant.<sup>a</sup>

|                   | Conversion (%) | Epoxide yield (%) | Epoxide selectivity (%) | TOF (mol product <sub>cyclohexane</sub><br>oxide mol <sub>Ti</sub> <sup>-1</sup> ·h <sup>-1</sup> ) |
|-------------------|----------------|-------------------|-------------------------|-----------------------------------------------------------------------------------------------------|
| Ti(isoPrO)-MCM-41 | 3.7            | 1.8               | 49                      | 15                                                                                                  |
| Ti(BuO)-MCM-41    | 38.2           | 15.0              | 39                      | 177                                                                                                 |

<sup>a</sup> Reaction conditions: catalyst, 10 mg; acetonitrile, 10 mL; cyclohexene, 10 mmol; *tert*-butyl hydroperoxide, 10 mmol; temp., 60 °C; time, 2 h.

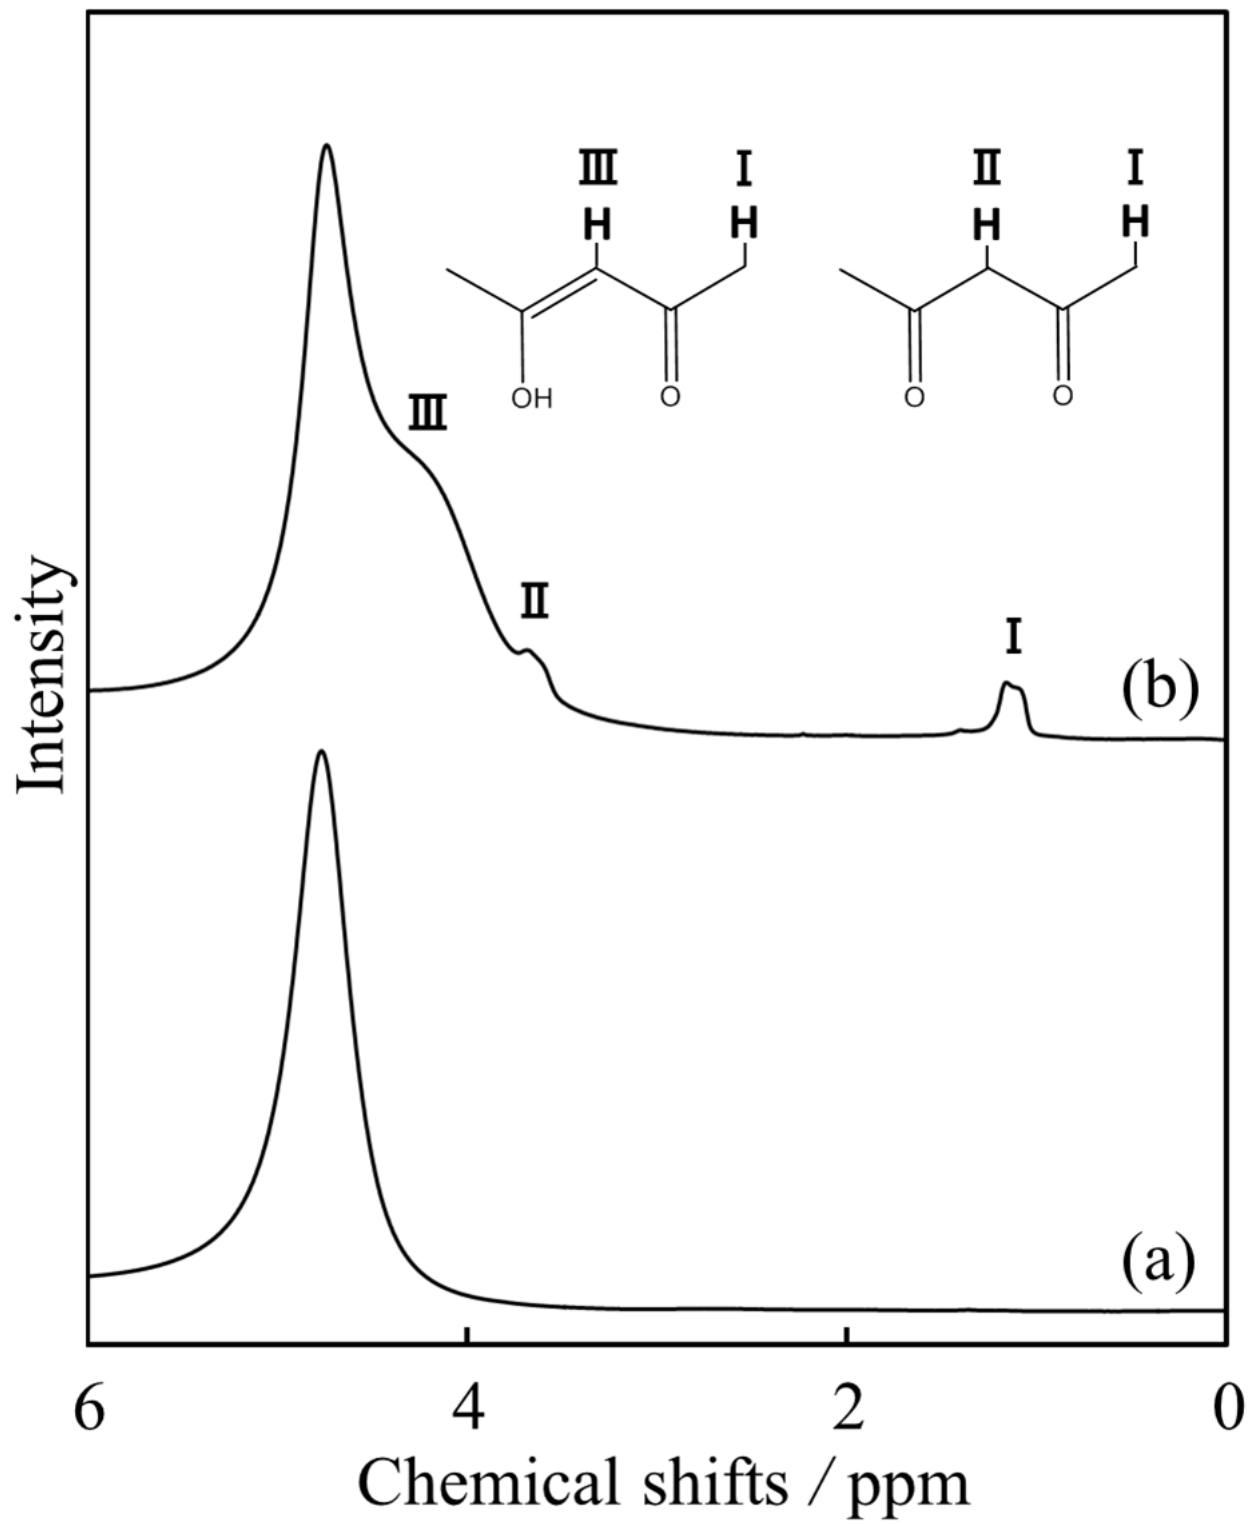

**Figure S1.**  $^1\text{H}$  MAS NMR spectra of (a) MCM-41 and (b) Ti(acac)-MCM-41.

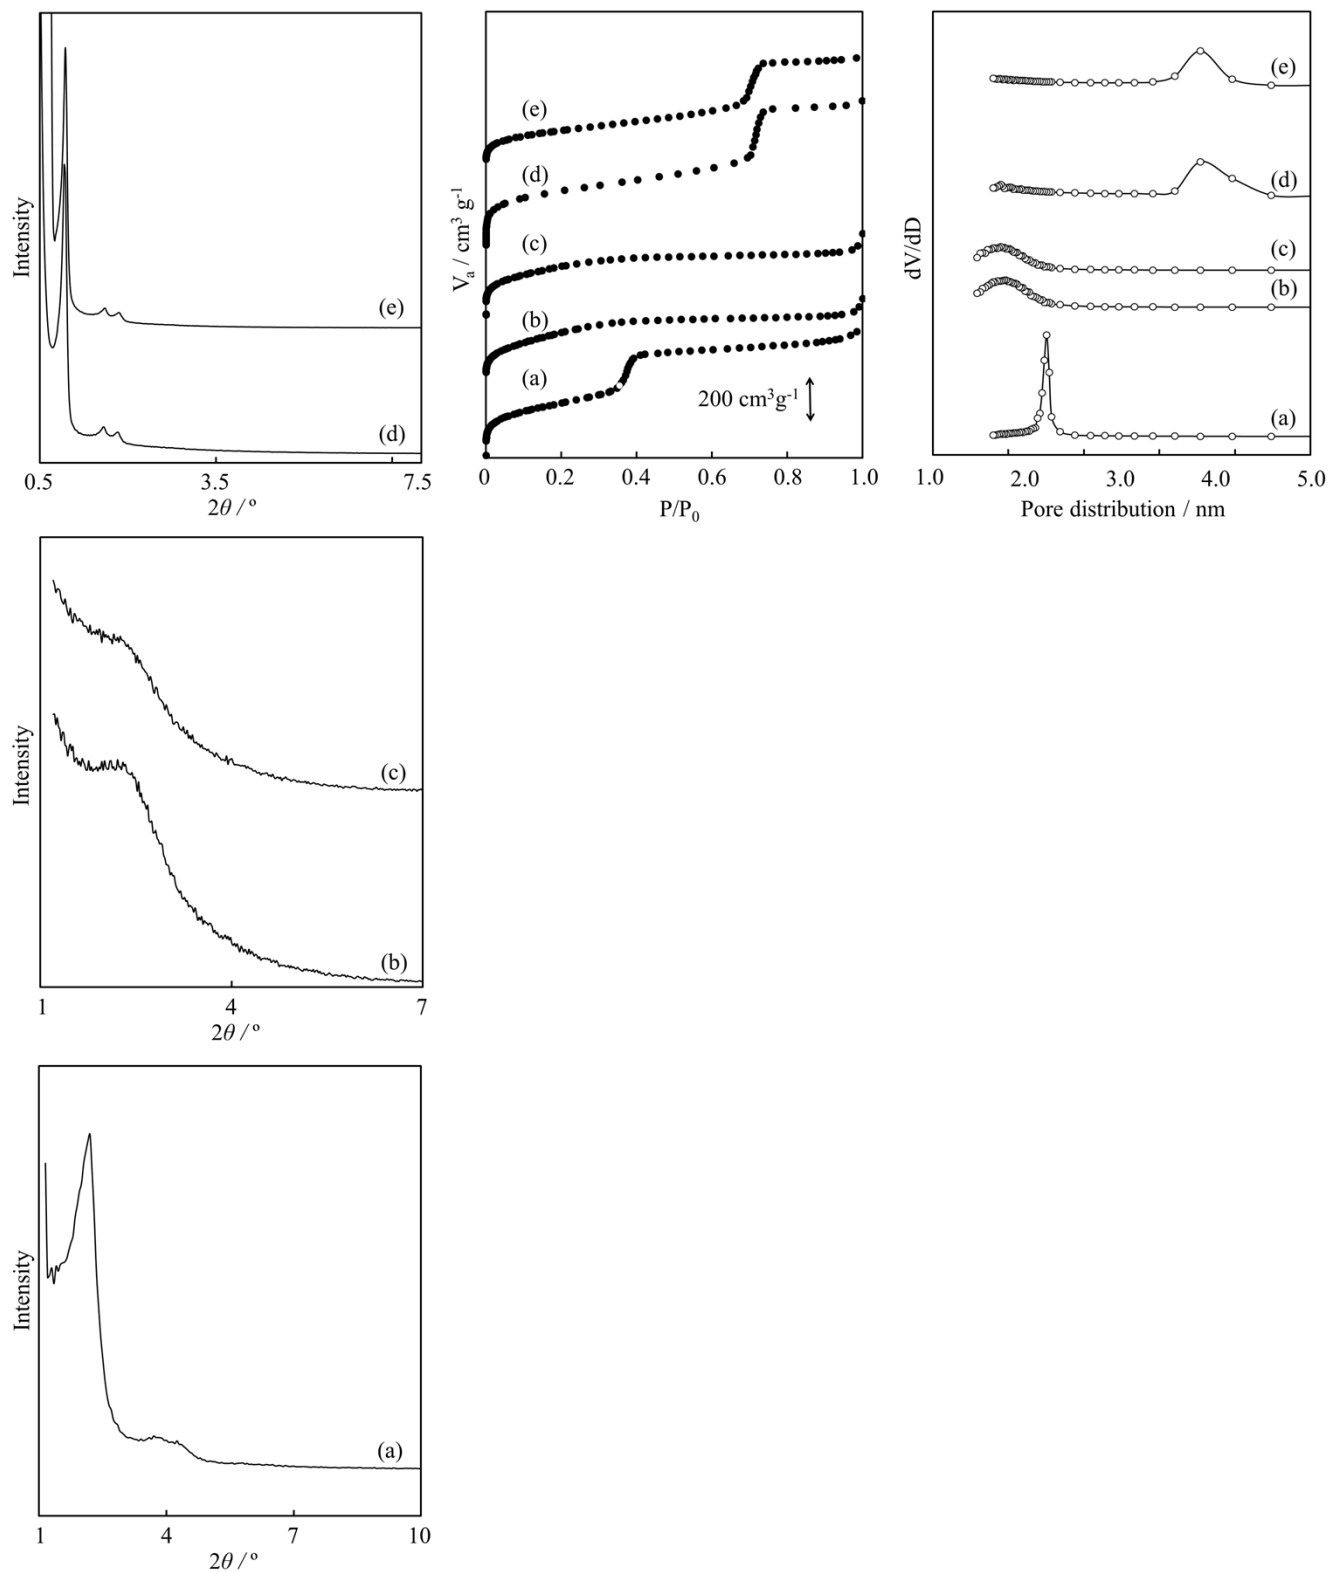

**Figure S2.** (left) XRD patterns, (center)  $N_2$  adsorption isotherms, and (right) BJH pore size distributions of (a) Ti-MCM-41(Ref.), (b) HUS-6, (c) Ti(acac)-HUS-6, (d) SBA-15, and (e) Ti(acac)-SBA-15.

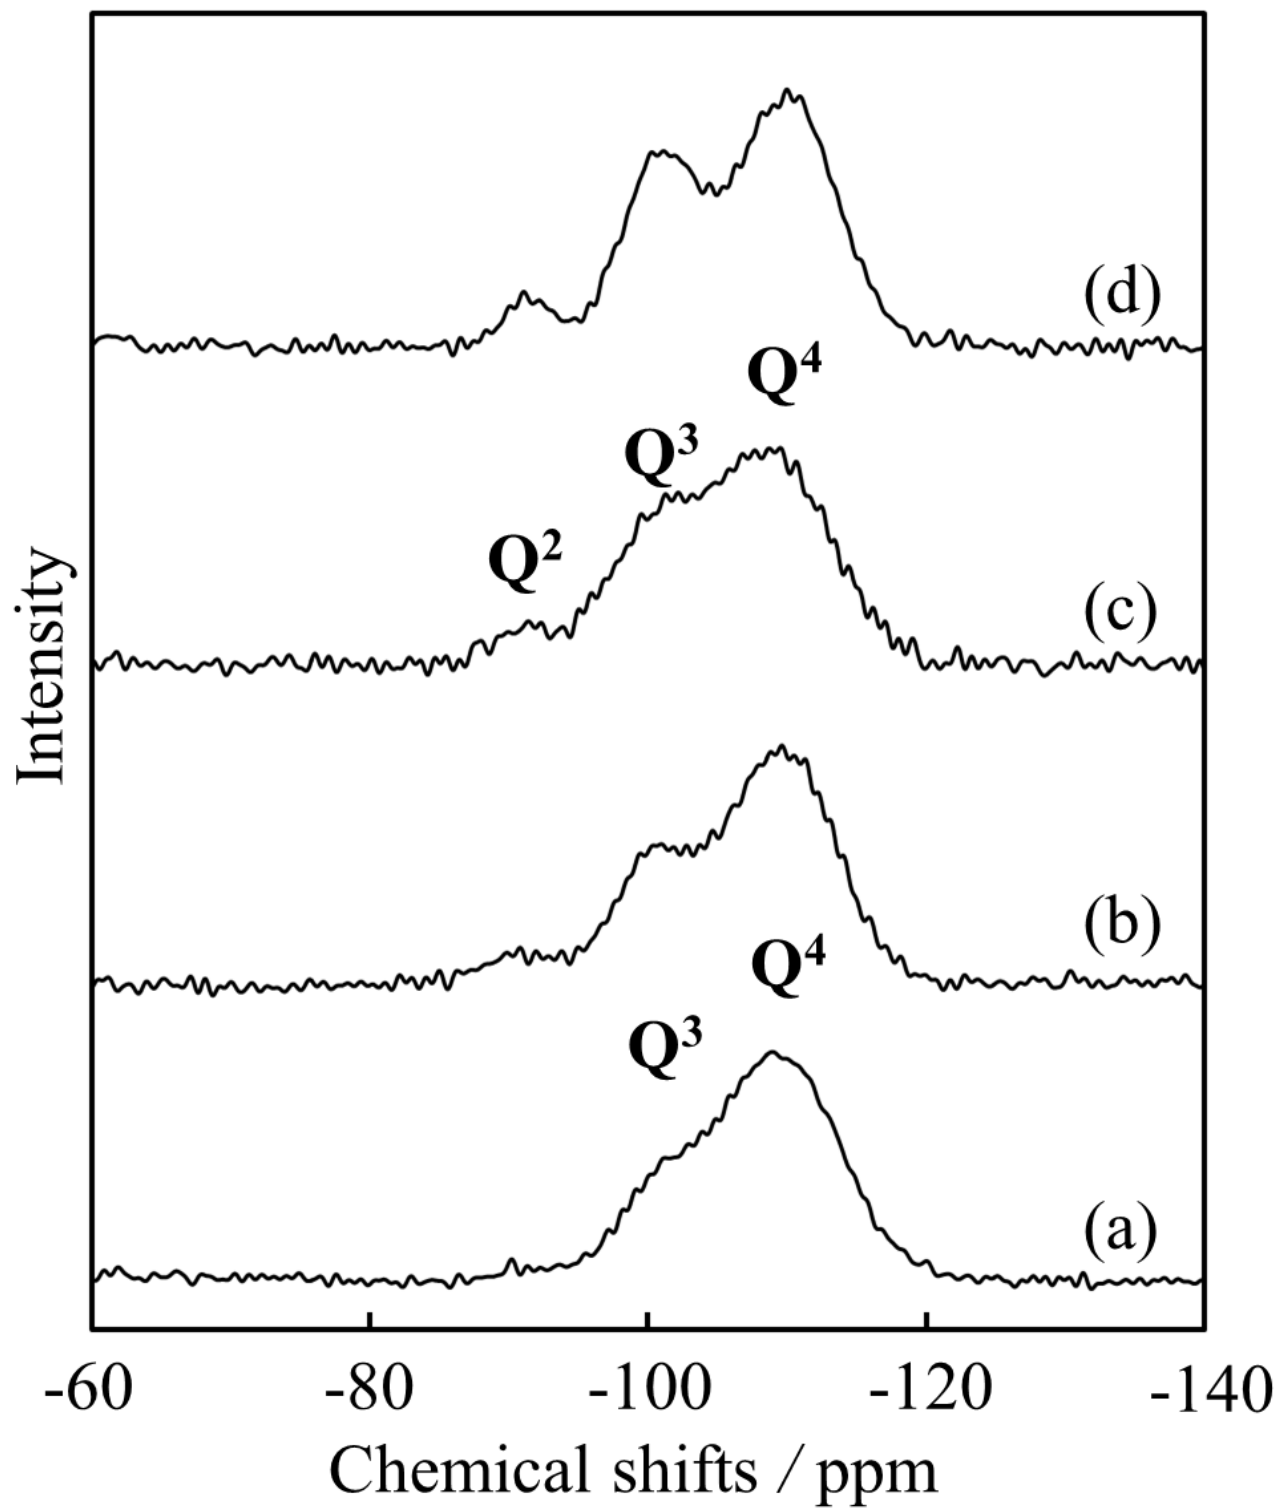

**Figure S3.**  $^{29}\text{Si}$  MAS NMR spectra of (a) HUS-6, (b) Ti(acac)-HUS-6, (c) SBA-15, and (d) Ti(acac)-SBA-15.

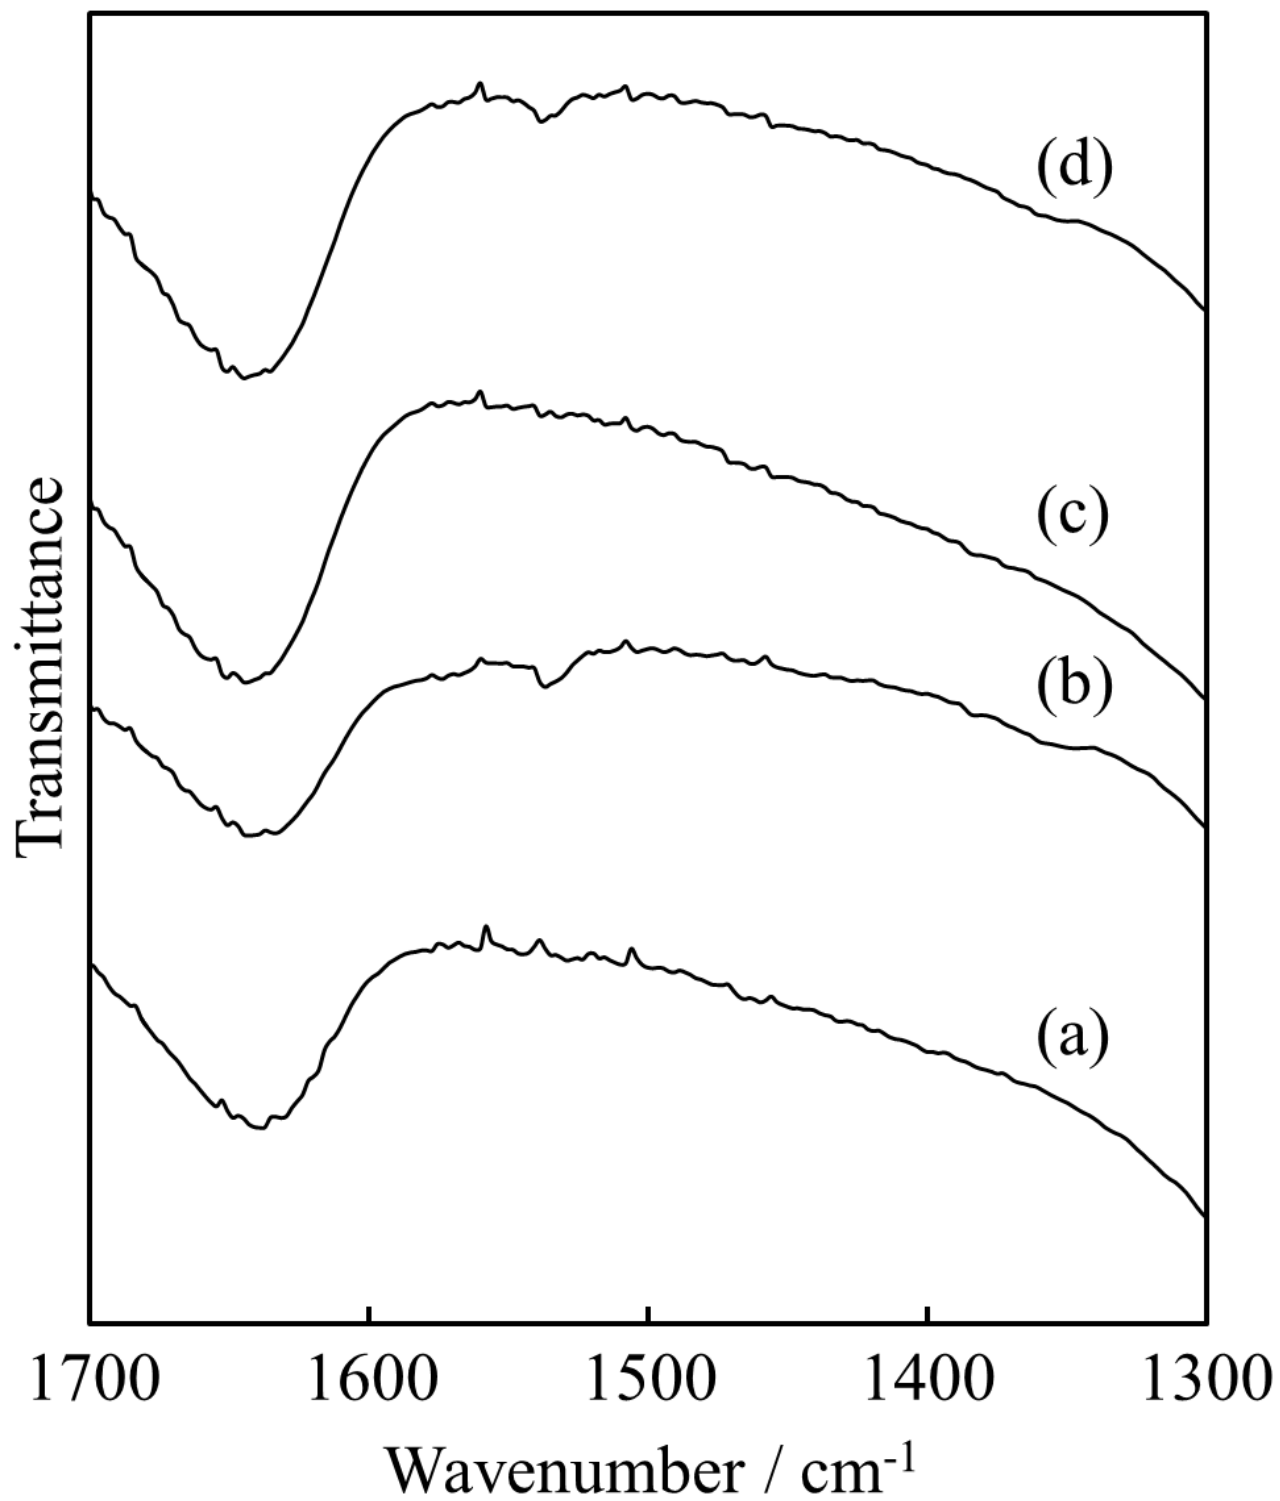

**Figure S4.** FT-IR spectra of (a) HUS-6, (b) Ti(acac)-HUS-6, (c) SBA-15, and (d) Ti(acac)-SBA-15.

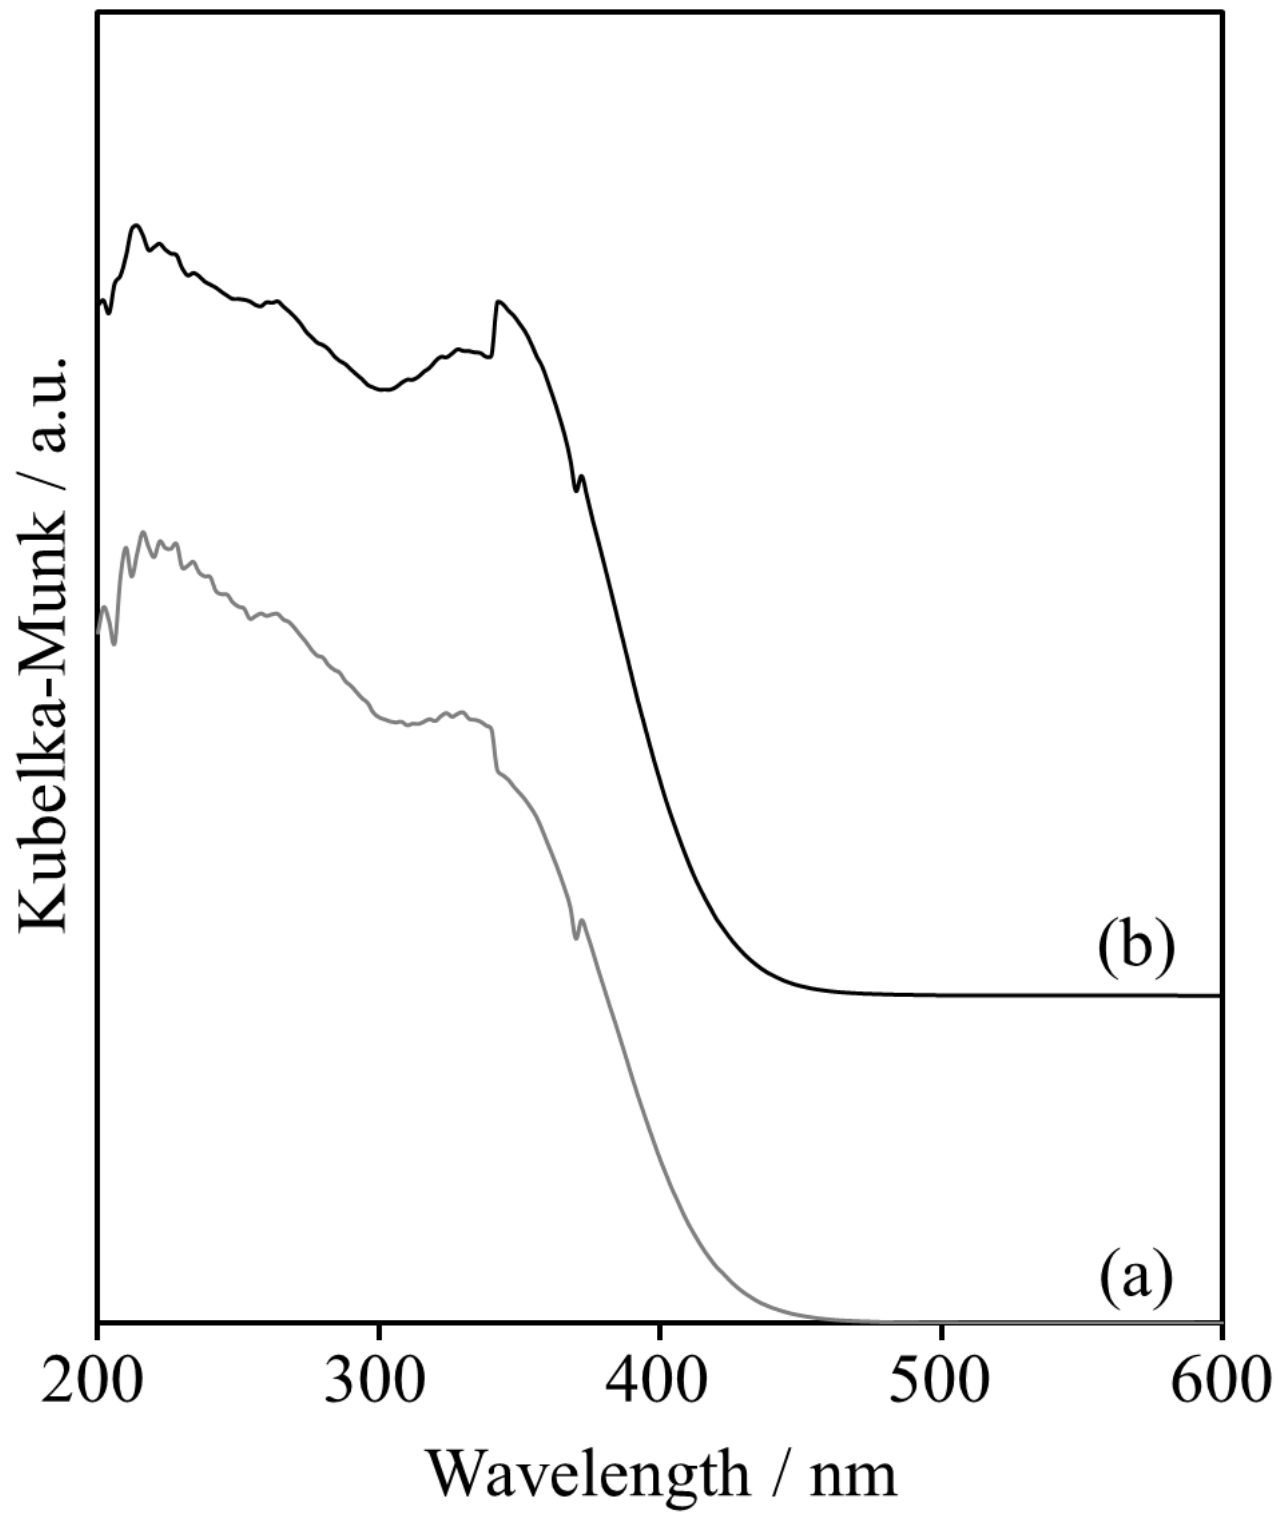

**Figure S5.** UV-vis spectra of (a) Ti(acac)-HUS-6 and (b) Ti(acac)-SBA-15.



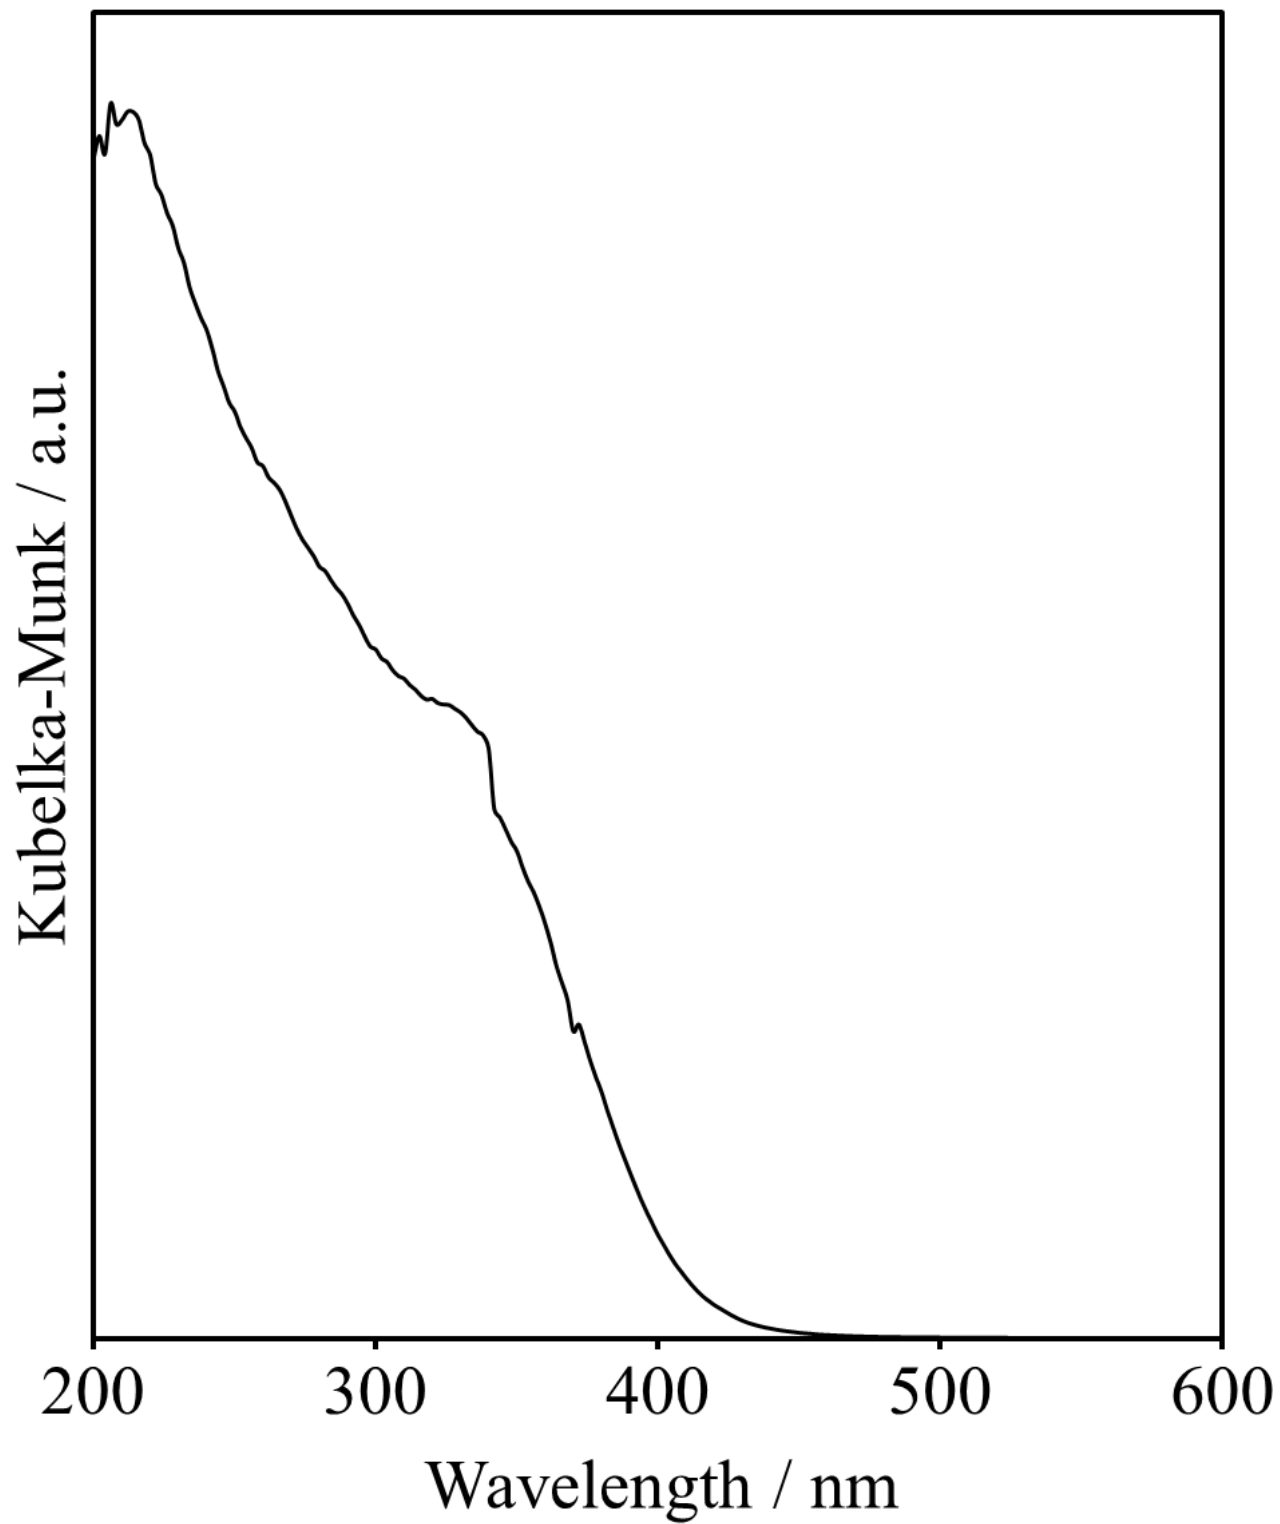

**Figure S6.** UV-vis spectrum of Ti(acac)-MCM-41 after reaction with large amount of acetylacetonone (acetylacetonone/Ti = 260).

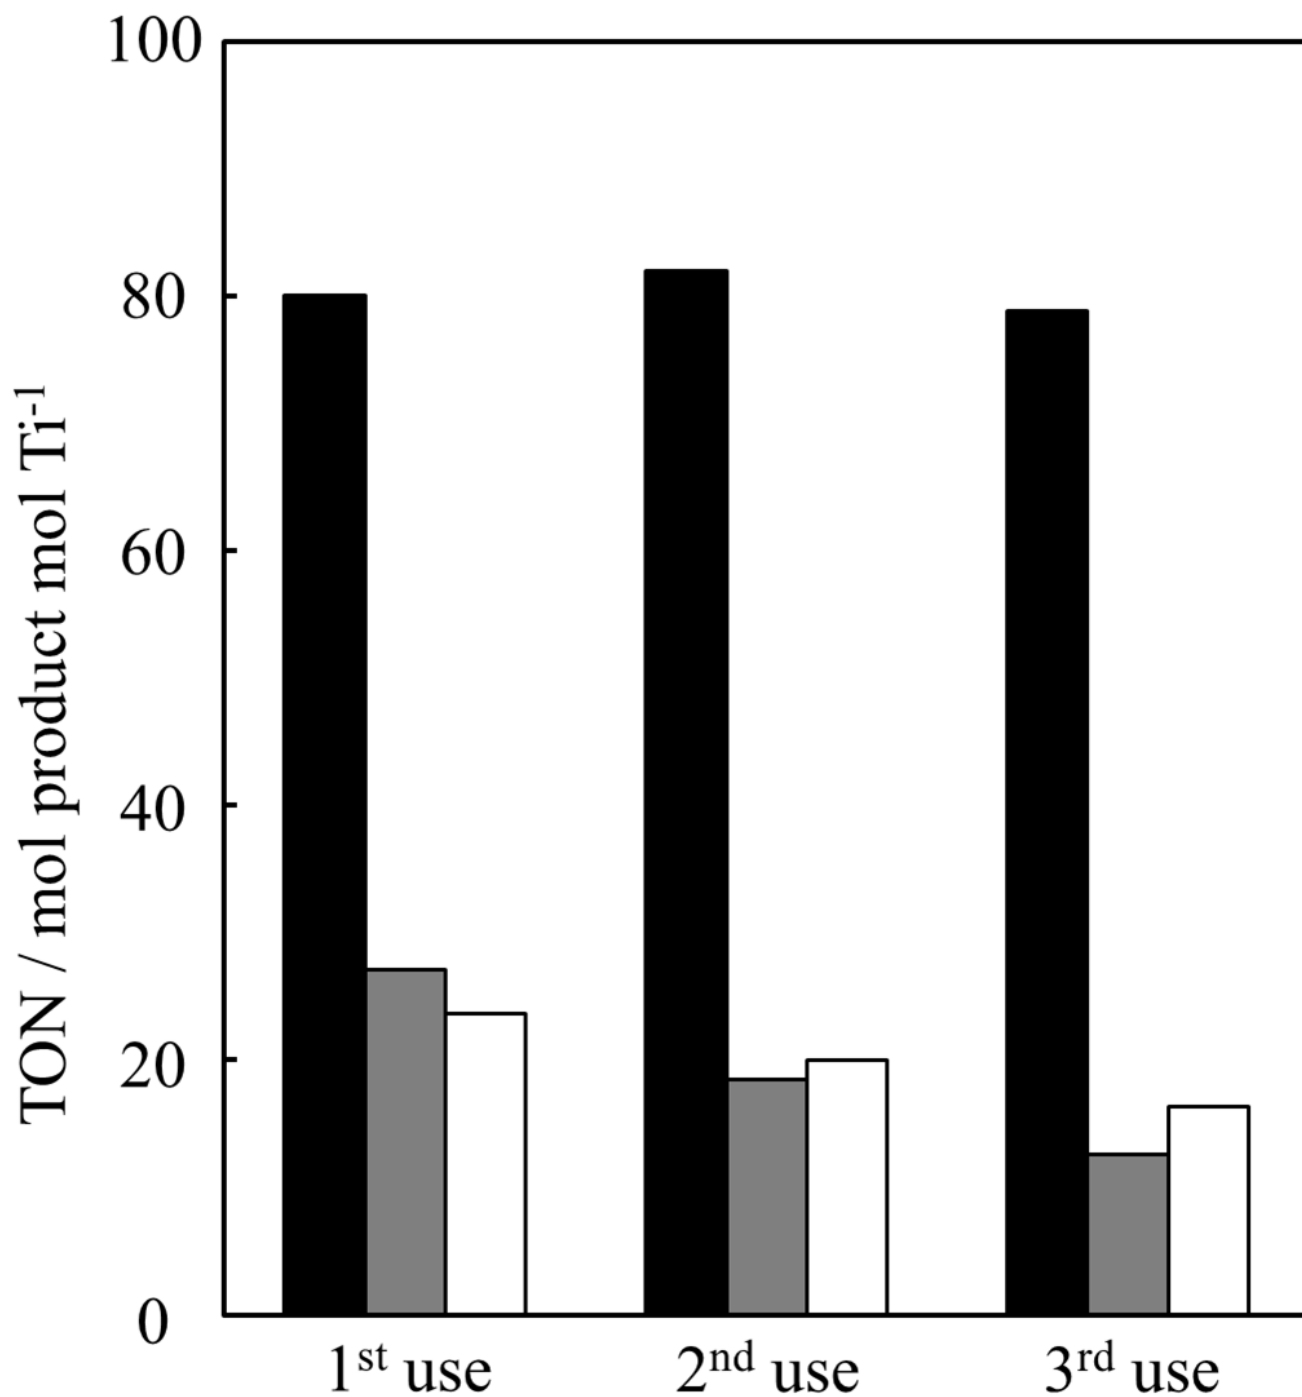

**Figure S7.** Catalytic reusability of (black) Ti(acac)-MCM-41, (grey) Ti(acac)-MCM-41cal, and (white) Ti-MCM-41(Ref.). Reaction conditions: catalyst, 50 mg; acetonitrile, 5 mL; cyclohexene, 5 mmol; *tert*-butyl hydroperoxide, 5 mmol; temp., 60 °C; time, 0.5 h.

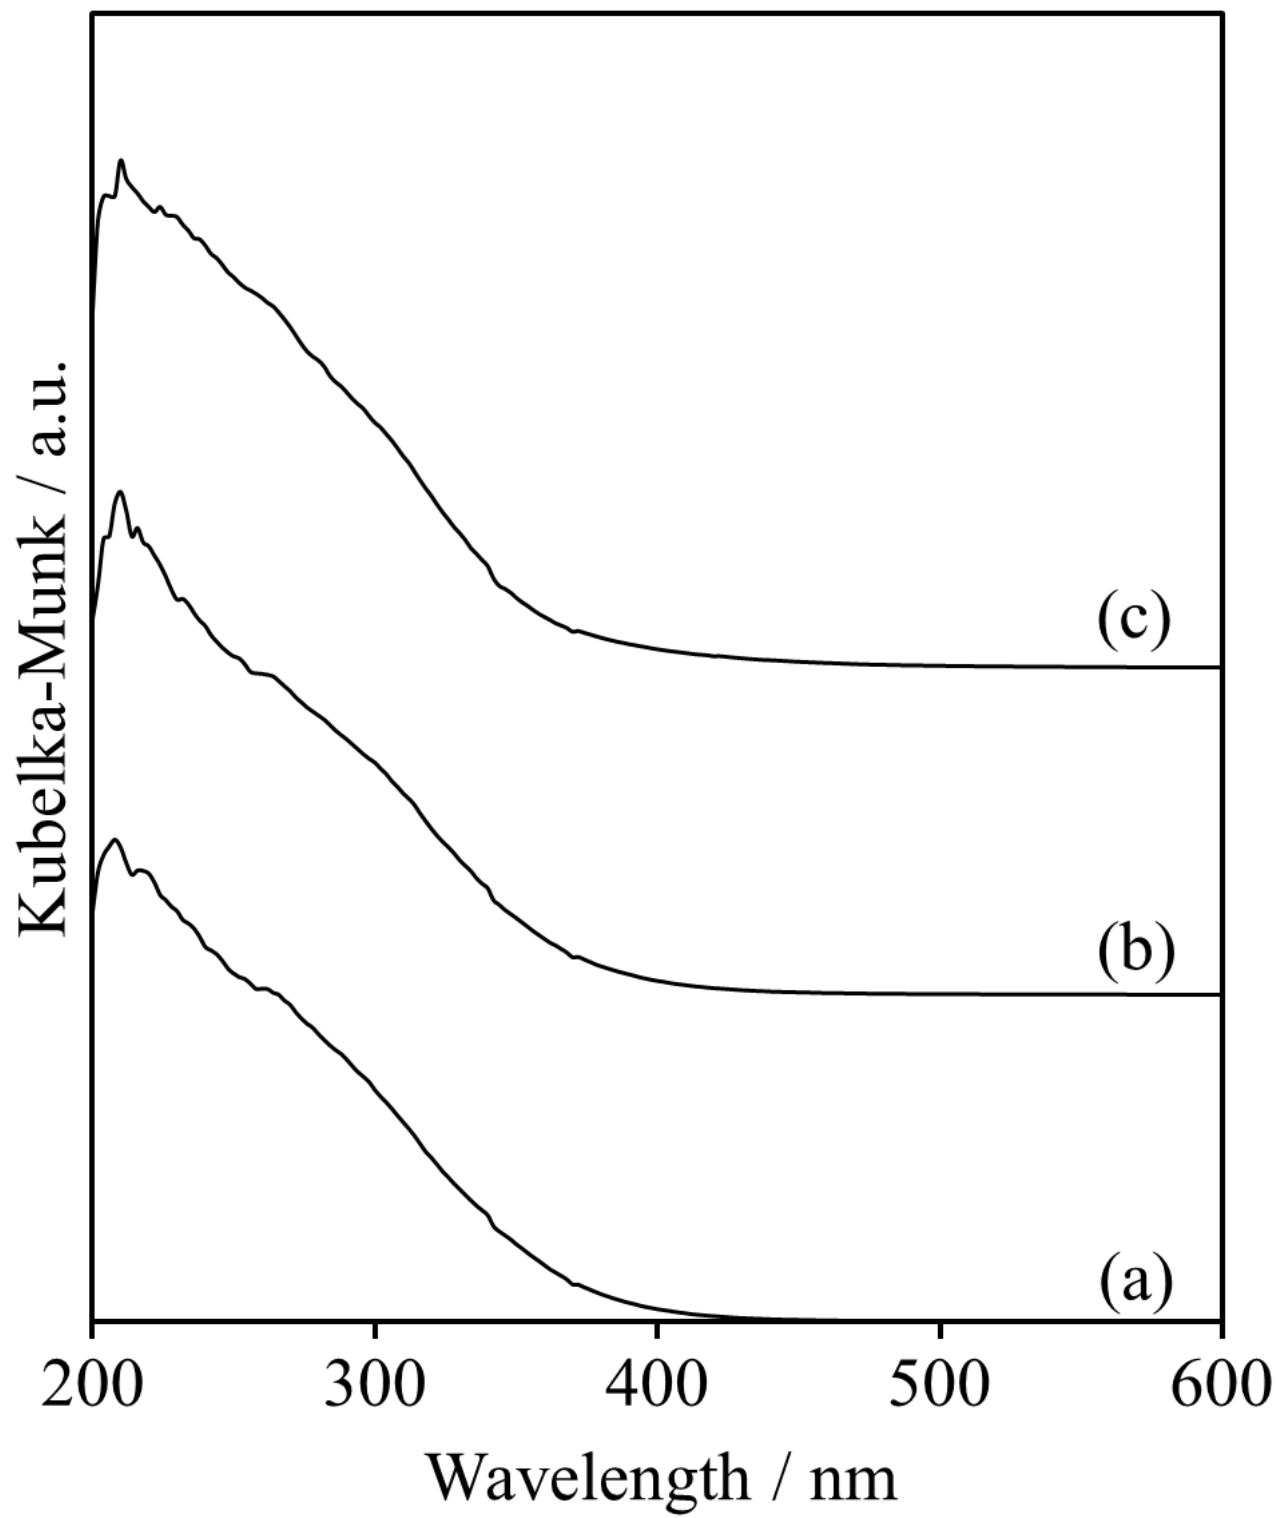

**Figure S8.** UV-vis spectra of Ti(acac)-MCM-41 after epoxidation of cyclohexene: (a) 1<sup>st</sup> run, (b) 2<sup>nd</sup> run, and (c) 3<sup>rd</sup> run.

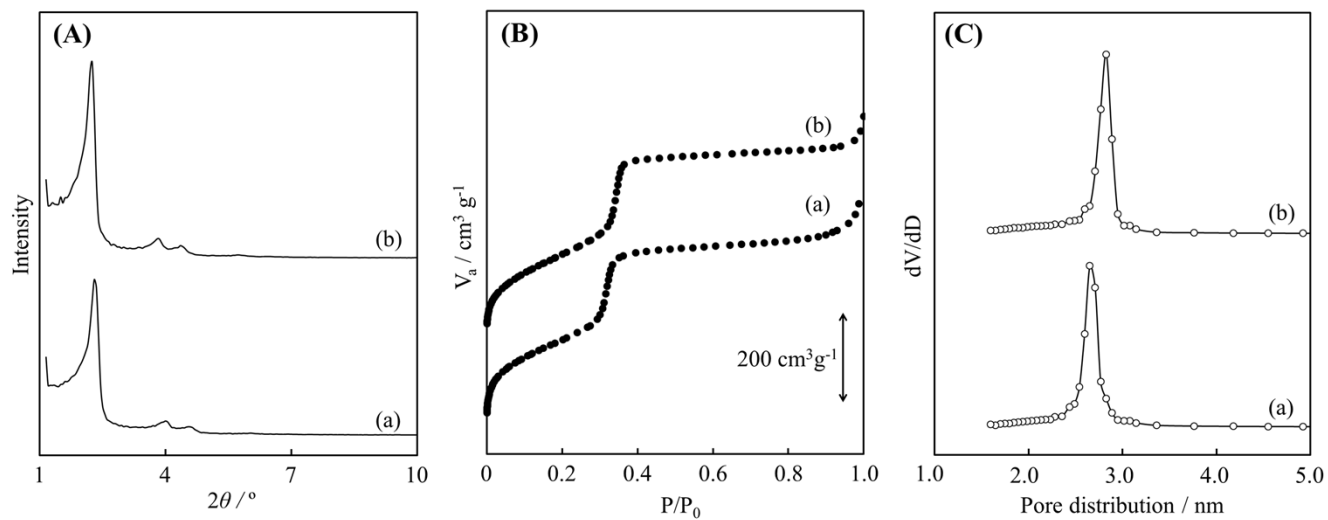

**Figure S9.** (A) XRD patterns, (B)  $N_2$  adsorption isotherms, and (C) BJH pore size distributions of (a) Ti(isoPrO)-MCM-41 and (b) Ti(BuO)-MCM-41.

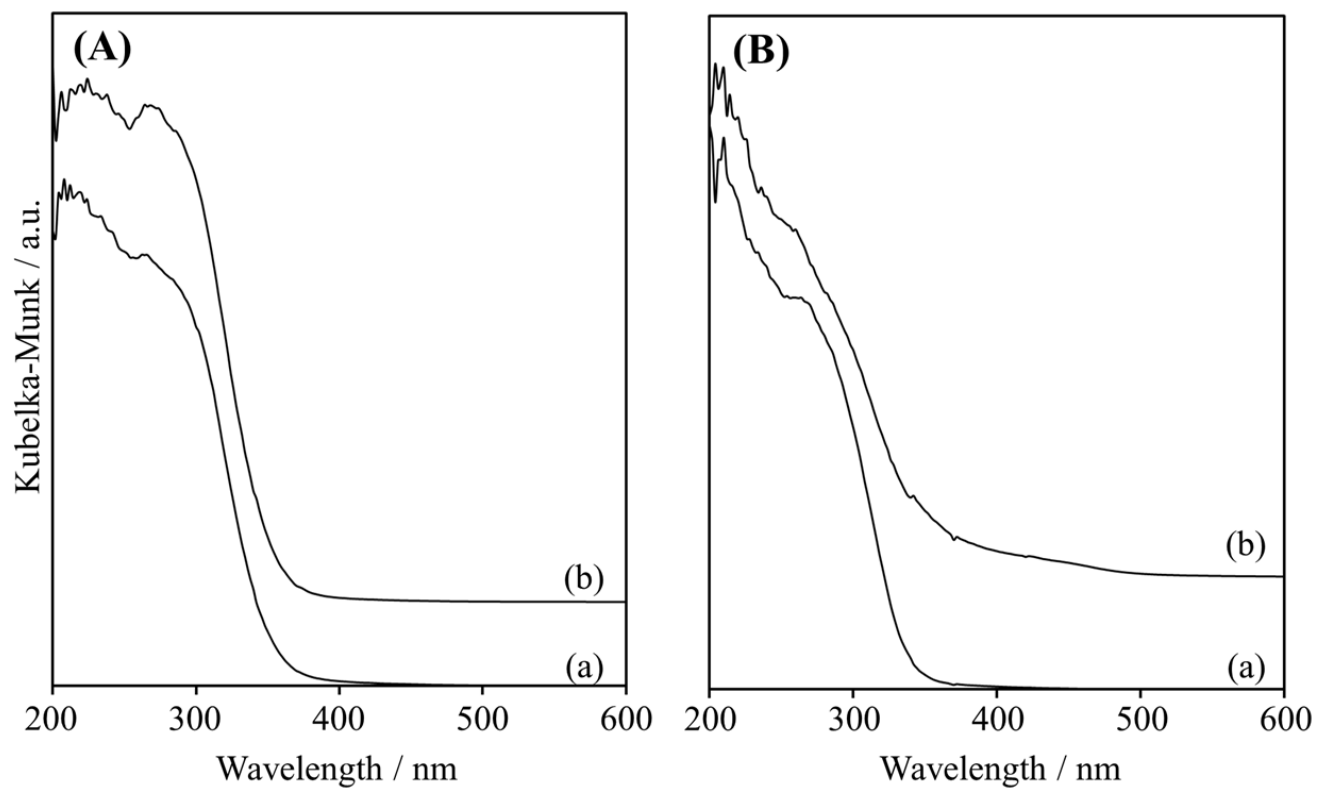

**Figure S10.** UV-vis spectra of (A) Ti(isoPrO)-MCM-41 and (B) Ti(BuO)-MCM-41 (a) before and (b) after epoxidation reaction.

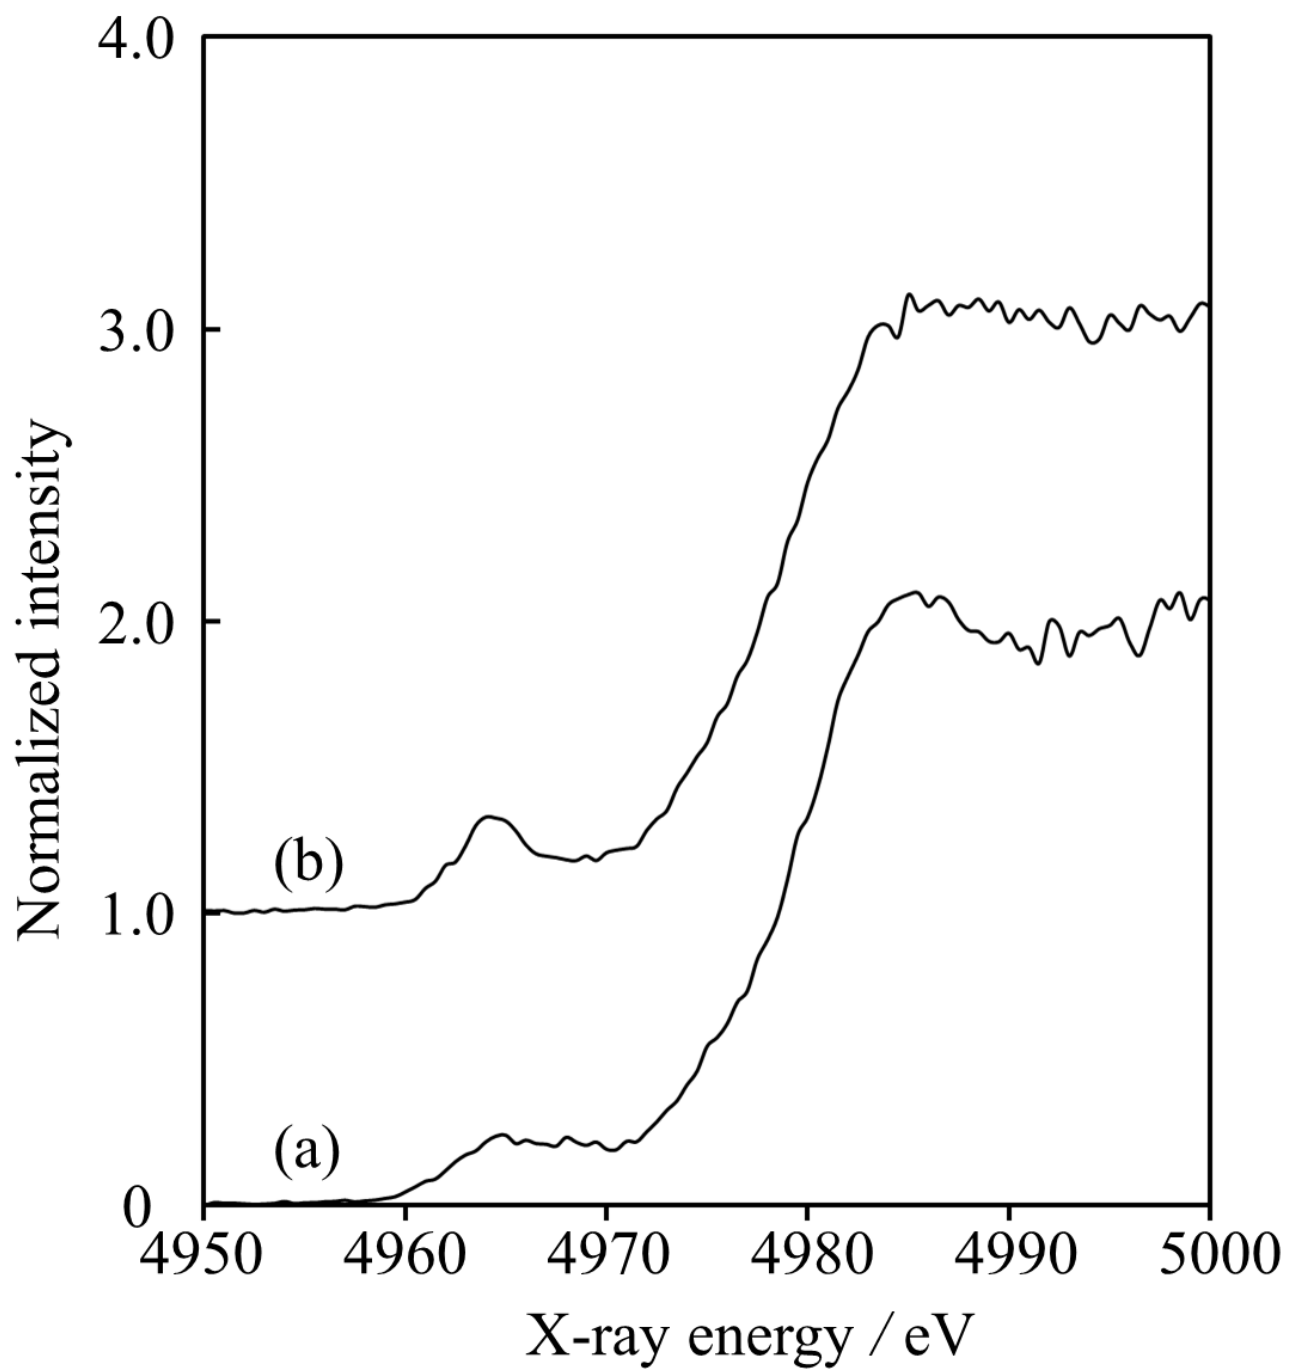

Figure S11. XANES spectra of (a) Ti(isoPrO)-MCM-41 and (b) Ti(BuO)-MCM-41.
